# Supplementary material for: Charge-transfer two-dimensional layers constructed from a 2 : 1 assembly of paddlewheel diruthenium(II,II) complexes and bis[1,2,5]thiadizolotetracyanoquinodimethane: bulk magnetic behavior as a function of inter-layer interactions
Source: Royal Society of Chemistry journal article supplement (doi:10.1039/b905486c), 2009-01-01
Supplement: b905486c.pdf [file b905486c.pdf]

## Supporting Information

**Charge-transfer two-dimensional layers constructed from a 2:1 assembly of paddlewheel diruthenium(II, II) complexes and bis[1,2,5]dithiazolotetracyanoquinodimethane: Bulk magnetic behavior as a function of inter-layer interactions**

**Natsuko Motokawa, Tomomi Oyama, Satoshi Matsunaga, Hitoshi Miyasaka,\*  
Masahiro Yamashita, and Kim R. Dunbar\***

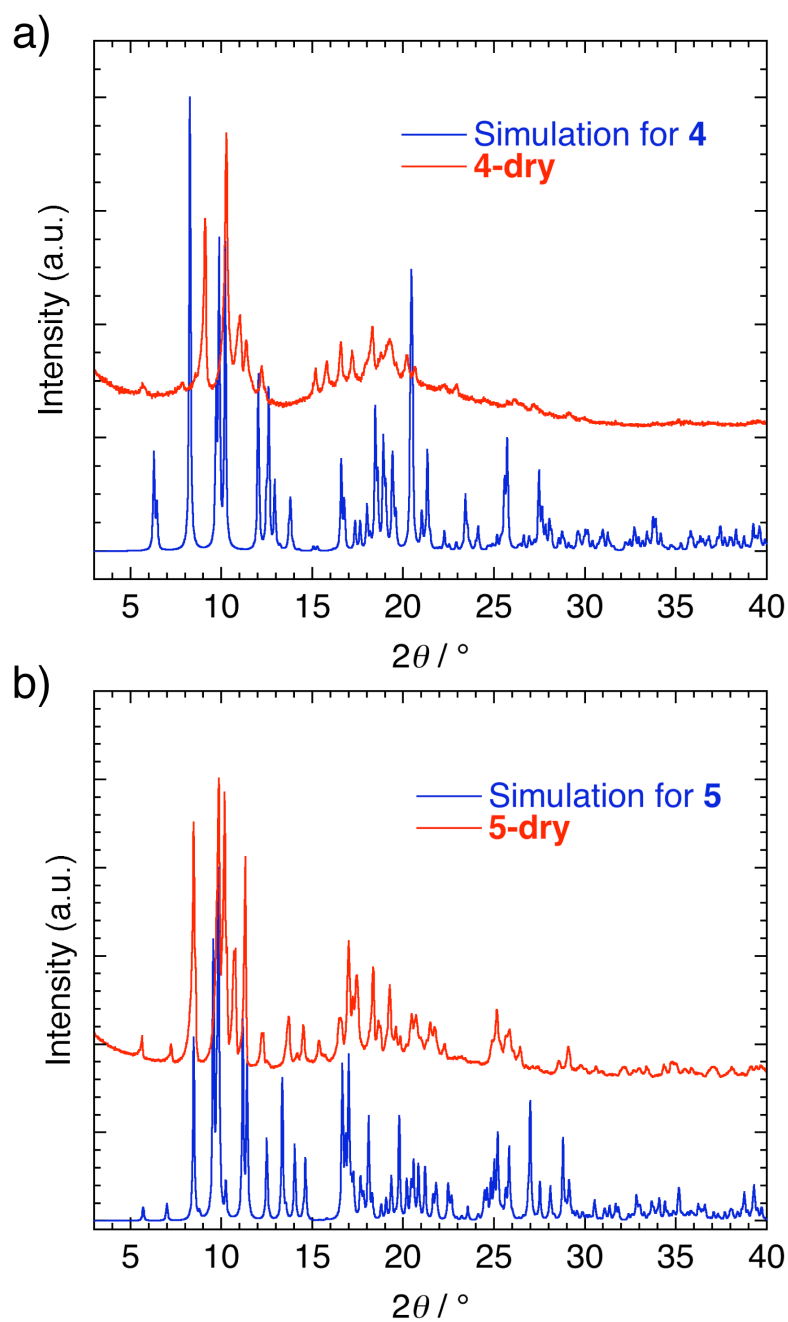

Fig. S1. XRPD patterns of **4-dry** (a) and **5-dry** (b) with simulated patterns of fresh samples **4** and **5**, where 4-dry and 5-dry were prepared by heating at 150°C.

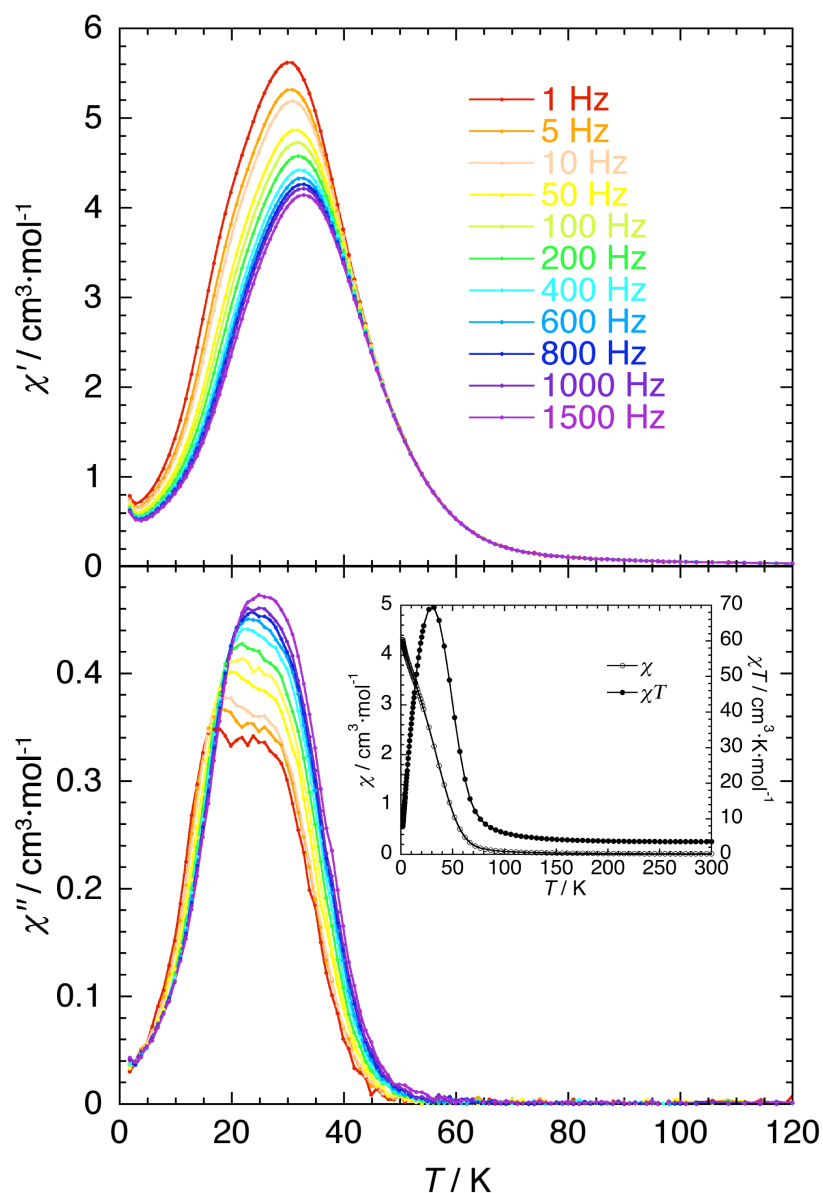

Fig. S2. Temperature dependence of ac susceptibilities ( $\chi'$ : in-phase and  $\chi''$ : out-of-phase) of dried sample of **4** (**4-dry**) prepared by removing the crystallization solvents heating up to 150°C (zero dc field and 3 Oe oscillation field). Inset: Temperature dependence of dc susceptibility ( $\chi$ ) and  $\chi T$  of **4-dry** measured at 1 kOe applied field.

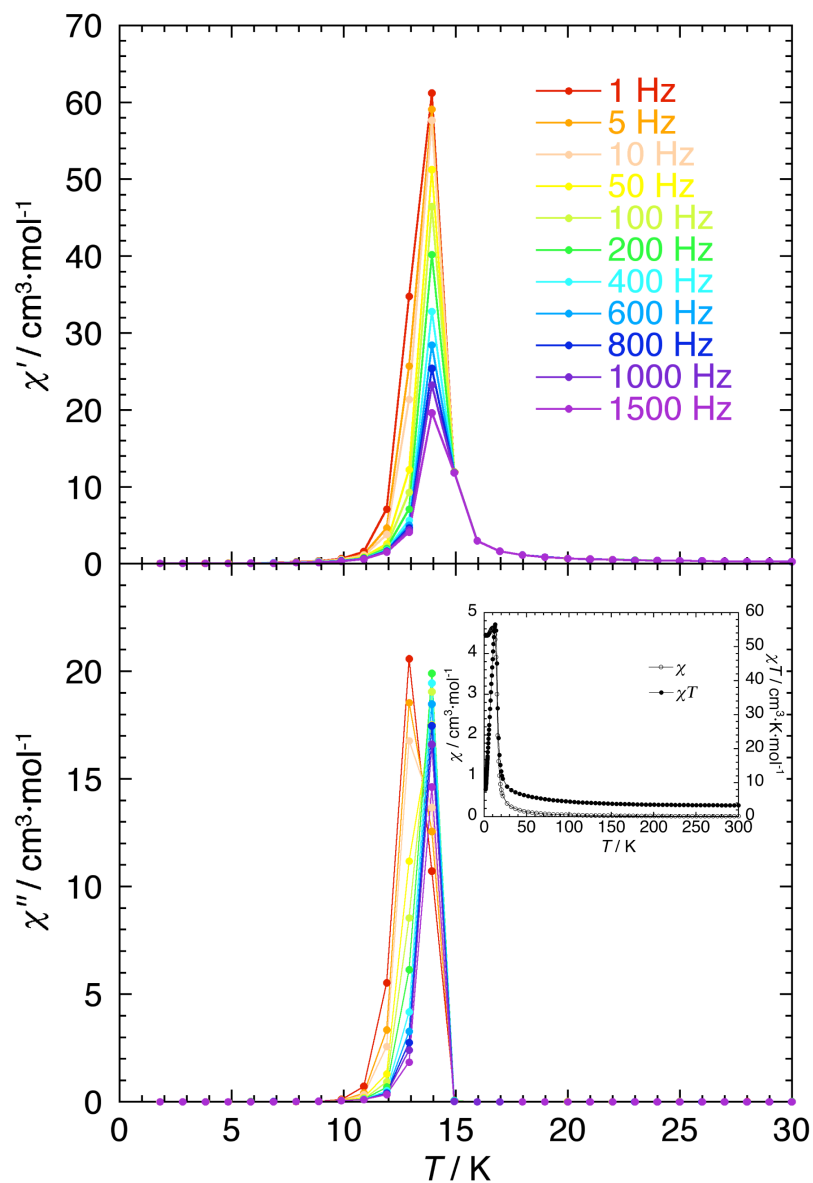

Fig. S3. Temperature dependence of ac susceptibilities ( $\chi'$ : in-phase and  $\chi''$ : out-of-phase) of dried sample of **5** (**5-dry**) prepared by removing the crystallization solvents heating up to 150°C (zero dc field and 3 Oe oscillation field). Inset: Temperature dependence of dc susceptibility ( $\chi$ ) and  $\chi T$  of **5-dry** measured at 1 kOe applied field.
